# Supplementary material
Source: publisher site journal article supplement (https://www.dovepress.com/article/481013)
Supplement: Supplementary file 1 [file get_supplementary_file.php]

**Supplementary Material 1** Medication Literacy Intervention (G-MedLitR Intervention) for Glaucoma

| Process | Theme | Objective | Content | Form |
| --- | --- | --- | --- | --- |
| Week 1 | Communication and Assessment | 1. Build trust between researchers and patients.  2. Help patients build confidence to complete the intervention.  3. Evaluate the patient's medication literacy and current medication status.  4. Provide behavioral cues to facilitate patient medication compliance. | 1. Interview the patient's experience and distress in the process of medication, express understanding and support, help the patient analyze the cause, explore their intrinsic motivation, and deepen the trust between the researchers and patients in the communication.  2. The researchers further explain the relevant theories of medication literacy and the specific arrangements of the intervention to the patients, clarify the possible benefits that patients may obtain after persisting in completing the intervention, and help the patients build confidence in completing the intervention.  3. Collect general information from patients and assess their medication literacy, medication self-efficacy, and medication adherence.  4. According to the patient's medication prescription, the researchers make and distribute targeted medication graphic instructions and medication record cards, and explain their use. Invite family members to supervise the patient's medication and record it. | Motivational Interviews ＆ Questionnaires  (Offline/Telephone) |
| Week 2 | Accumulation and Motivation Stimulation  - Disease Knowledge | 1. Educate patients about glaucoma diseases.  2. To Make patients perceive the susceptibility and severity of glaucoma diseases, and stimulate the motivation of patients to change behavior.  3. Answer the common problems of patients with glaucoma disease.  4. Evaluate the effectiveness of the intervention at this stage, obtain patient feedback, and make continuous improvements. | 1. Explain the concept, pathogenesis, typical symptoms, main treatment methods and precautions in life of glaucoma disease.  2. Explain the epidemiology, predisposing groups and predisposing factors of glaucoma disease, explain the mechanism and possible consequences of glaucoma disease on visual damage, and do a good job of positive motivational guidance.  3. Answer the patient's concerns such as whether glaucoma is hereditary, whether one eye will get glaucoma after the other is diagnosed, and whether glaucoma will eventually lead to blindness.  4. Guide patients to talk about what they have gained, ask about learning puzzles, and get suggestions for improvement. | Thematic Lectures  (Online) |
| Week 3 | Information Accumulation and Motivation Stimulation  - Knowledge of Medication | 1. To make patients understand the importance of medication treatment for glaucoma patients, understand the benefits that standardized medication can bring to patients, and stimulate the motivation of patients to change behavior.  2. To make patients understand the commonly used medications for glaucoma. Understand the efficacy, usage and precautions of the medications you use, and be able to identify and respond to the adverse reactions of medications.  3. Answer the common confusion of patients during medication use, and improve patients' medication management ability.  4. Evaluate the effectiveness of the intervention at this stage, obtain patient feedback, and make continuous improvements. | 1. Explain the importance of regular use of medications to protect patients' vision. Describes the current situation of poor medication in glaucoma patients and the serious harm it brings.  2. Explain the types, efficacy, use, precautions, common adverse reactions and coping treatment of commonly used drugs for glaucoma patients.  3. Explain “how to reasonably arrange the medication time, how to reasonably arrange the medication sequence, the use period and storage method of the medication after unsealing”, and other patient concerns.  4. Guide patients to talk about what they have gained, ask about learning puzzles, and get suggestions for improvement. | Thematic Lectures  (Online) |
| Week 4 | Medium-term Feedback and Incentives | 1. Consolidate what you have learned and strengthen your memory.  2. Understand the patient's recent medication experience, perceive the patient's medication obstacles and assist the patient to solve them.  3. Motivate the patient to continue the intervention.  4. Get patient feedback and continuous improvement.  5. Remind patients of the recent outpatient review. | 1. The key content of the lectures in the second and third weeks was refined and sent to the patients in the form of speech to strengthen their memory.  2. Telephone follow-up of the patient's recent medication and obstacles, and assist the patient to solve it as much as possible.  3. Affirm the phased results achieved by patients and motivate them to continue to receive intervention.  4. Obtain periodic feedback from patients and make continuous improvements to the intervention.  5. Follow the doctor's instructions to remind patients to undergo outpatient re-examination in the near future, and assist them in making appointments if necessary. | Online Communication  (Telephone Follow-up) |
| Week 5 | Share and Communicate | 1. To make patients perceive the susceptibility and severity of glaucoma disease, the importance of medication literacy and the beneficial nature of standardized medication.  2. Share medication use experience and help patients solve medication barriers.  3. Give patients external support, encourage them to improve their medication literacy, and standardize the use of medications. | 1. Share real glaucoma cases, and compare the final disease outcomes of patients with different medication literacy, so that patients can once again perceive the susceptibility and severity of the disease, and believe in the importance of medication literacy and the benefits of standardized medication use.  2. Invite glaucoma patients to talk about their journey of fighting the disease in the form of video or voice, share their experience and experience in medication use, and help patients use medications more standardly.  3. Invite family members of glaucoma patients to express their support and encouragement to motivate patients to overcome the disease. | Thematic Sharing Sessions  (Online) |
| Week 6 | Skills Training 1  - Proper Use of Eye Drops | 1. Teach patients and their families to use eye drops and ointments correctly.  2. To enable patients and their families to master the key aspects of using eye drops and ointments.  3. Evaluate the effectiveness of the intervention at this stage, obtain patient feedback, and make continuous improvements. | 1. Demonstrate the correct way to apply eye drops and ointment.  2. Demonstrate the error-prone details of the operation step by step, emphasizing the key points of the operation.  3. Invite patients to share videos of eye drops/ointments applied. The researcher looks for deficiencies and corrects them. Ask the patient about their learning confusion and get suggestions for improvement. | Skills Teach-in ＆  Hands-on Exercises  (Online) |
| Week 7 | Skills Training 2  - Read the Medication Leaflet | 1. To enable patients to understand the structure, content and meaning of common medication inserts.  2. Enable patients to accurately understand the key information of the medication by reading the instructions.  3. Evaluate the effectiveness of the intervention at this stage, obtain patient feedback, and make continuous improvements. | 1. Explain the structure, content and meaning of common medication instructions with examples.  2. Focus on explaining the medication instructions (such as medication name, dosage, method of use, adverse reactions, expiration date, etc.) that patients need to know when taking medications.  3. Invite the patient to read and answer the key information on the label of the assigned medication. Ask the patient about their learning confusion and get suggestions for improvement. | Thematic Lectures  Hands-on Exercises  (Online) |
| Week 8 | Final Evaluation and Feedback | 1. Strengthen the medication skills learned in the previous stage.  2. Summarize the key points of previous interventions, affirm the efforts of patients and thank them.  3. Remind patients of recent outpatient re-examinations.  4. Obtain patient feedback, evaluate the effect of intervention, and make continuous improvement. | 1. Refine the key links of the medication-related skills learned in the 6th and 7th weeks, and consolidate the learning again in the form of pictures and videos.  2. Summarize the key points of previous interventions, make a review booklet and hand it to the patients, and give thank-you letters and small gifts.  3. Follow the doctor's instructions to remind the patient to undergo outpatient re-examination in the near future, and assist him in making an appointment if necessary.  4. Ask the patients about their feelings about the whole process of intervention, obtain feedback and opinions from patients and their families. Assess patients’ medication literacy, medication self-efficacy, and medication adherence. | Exchange Interviews ＆ Questionnaire Assessment  (Online/Offline) |
